# Supplementary material for: Improving Ozone Simulations in Asia via Multisource Data Assimilation: Results from an Observing System Simulation Experiment with GEMS Geostationary Satellite Observations
Source: Copernicus journal article supplement (doi:10.5194/acp-2022-744), 2022-12-12
Supplement: Supplementary file 1 [file acp-2022-744-supplement.pdf]

# Improving Ozone Simulations in Asia via Multisource Data Assimilation: Results from an Observing System Simulation Experiment with GEMS Geostationary Satellite Observations

5 Lei Shu<sup>1,2</sup>, Lei Zhu<sup>2,3</sup>, Juseon Bak<sup>4</sup>, Peter Zoogman<sup>5</sup>, Han Han<sup>1</sup>, Song Liu<sup>2</sup>, Xicheng Li<sup>2</sup>, Shuai Sun<sup>2</sup>,  
Juan Li<sup>2</sup>, Yuyang Chen<sup>2</sup>, Dongchuan Pu<sup>2</sup>, Xiaoxing Zuo<sup>2</sup>, Weitao Fu<sup>2</sup>, Xin Yang<sup>2,3</sup>, and Tzung-May  
Fu<sup>2,3</sup>

<sup>1</sup>School of Geographical Sciences, Fujian Normal University, Fuzhou, Fujian 350007, China

10 <sup>2</sup>School of Environmental Science and Engineering, Southern University of Science and Technology, Shenzhen, Guangdong  
518055, China

<sup>3</sup>Guangdong Provincial Observation and Research Station for Coastal Atmosphere and Climate of the Greater Bay Area,  
Shenzhen, Guangdong 518055, China

<sup>4</sup>Institute of Environmental Studies, Pusan National University, Busan 46241, South Korea

<sup>5</sup>Harvard-Smithsonian Center for Astrophysics, Cambridge, Massachusetts 02138, United States

15 *Correspondence to:* Lei Zhu (zhul3@sustech.edu.cn)

## Contents of this file

Table S1

Figures S1 to S6

20

**Table S1. WRF-Chem and GEOS-Chem model configurations.**

| Configurations                           | (1) WRF-Chem v4.1                                                                                                                                                                                                                                                                                            | (2) GEOS-Chem v12.9.3                                                                                                                                                                                                                           |
|------------------------------------------|--------------------------------------------------------------------------------------------------------------------------------------------------------------------------------------------------------------------------------------------------------------------------------------------------------------|-------------------------------------------------------------------------------------------------------------------------------------------------------------------------------------------------------------------------------------------------|
| Global simulation                        | —                                                                                                                                                                                                                                                                                                            | $2^\circ \times 2.5^\circ$ with 72 vertical layers up to 0.1 hPa, spin-up time of 1 year                                                                                                                                                        |
| Asian simulation                         | $50 \text{ km} \times 50 \text{ km}$ (centered at $35^\circ\text{N}$ , $103^\circ\text{E}$ ) with 34 vertical layers up to 50 hPa, spin-up time of 72 h                                                                                                                                                      | $0.5^\circ \times 0.625^\circ$ ( $11^\circ\text{S}$ – $55^\circ\text{N}$ , $60^\circ$ – $150^\circ\text{E}$ ) with 47 vertical layers up to 0.1 hPa, boundary conditions updated every 3 h from the global simulation, spin-up time of 6 months |
| Meteorological conditions                | National Centers for Environmental Prediction (NCEP) Final (FNL) operational global analysis ( <a href="https://rda.ucar.edu/datasets/ds083.3">https://rda.ucar.edu/datasets/ds083.3</a> , last access: 28 October 2022), $0.25^\circ \times 0.25^\circ$                                                     | Modern-Era Retrospective Analysis for Research and Applications, Version 2 (MERRA-2) meteorological fields (Gelaro <i>et al.</i> , 2017)                                                                                                        |
| Chemical initial and boundary conditions | Whole Atmosphere Community Climate Model (WACCM) 6 h outputs (Gettelman <i>et al.</i> , 2019)                                                                                                                                                                                                                | —                                                                                                                                                                                                                                               |
| Anthropogenic emission                   | Multi-resolution Emissions Inventory for China (MEIC) (Zheng <i>et al.</i> , 2018), $0.25^\circ \times 0.25^\circ$ ; Emissions Database for Global Atmospheric Research-Hemispheric Transport of Air Pollution (EDGAR-HTAP) (Janssens-Maenhout <i>et al.</i> , 2015) outside China, $1^\circ \times 1^\circ$ | Community Emissions Data System (CEDS) (Hoesly <i>et al.</i> , 2018), substituted by MIX inventory (Li <i>et al.</i> , 2017) over Asia                                                                                                          |
| Biogenic emission                        | Model of Emissions of Gases and Aerosols from Nature (MEGAN) (Guenther <i>et al.</i> , 2012)                                                                                                                                                                                                                 | MEGAN                                                                                                                                                                                                                                           |
| Fire emission                            | Fire INventory from NCAR (FINN) version 1.5 (Wiedinmyer <i>et al.</i> , 2011)                                                                                                                                                                                                                                | the fourth-generation Global Fire Emissions Database (GFED4) (Giglio <i>et al.</i> , 2013)                                                                                                                                                      |
| Chemical mechanism                       | CBMZ chemical mechanism (Zaveri and Peters, 1999) for gas-phase chemistry and MOSAIC aerosol scheme configured with 4 sectional aerosol bins (Zaveri <i>et al.</i> , 2008)                                                                                                                                   | $\text{HO}_x$ - $\text{NO}_x$ -VOC-ozone-aerosol-halogen tropospheric chemistry mechanism (Bey <i>et al.</i> , 2001; Park <i>et al.</i> , 2004; Mao <i>et al.</i> , 2013)                                                                       |

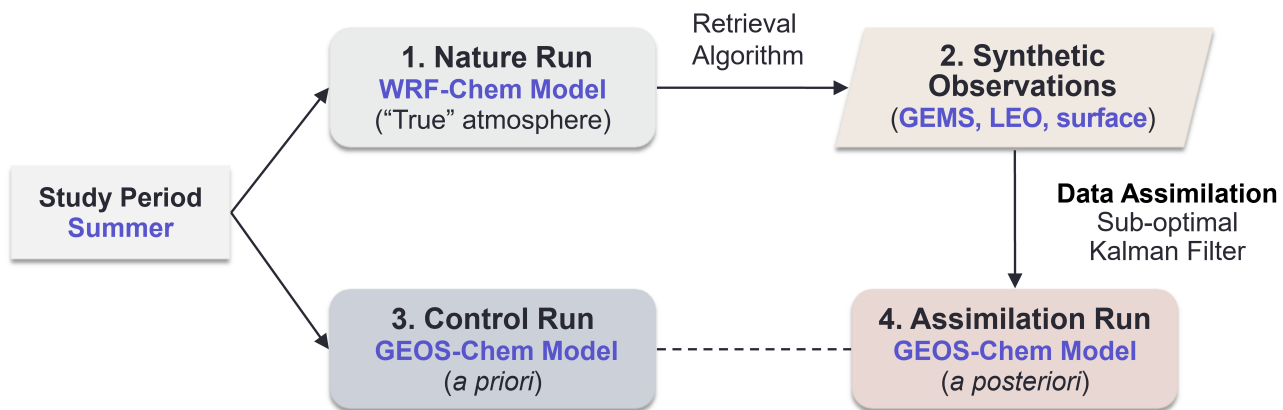

25 Figure S1. The framework of the Observing System Simulation Experiment (OSSE). Modified from Shu *et al.* (2022).

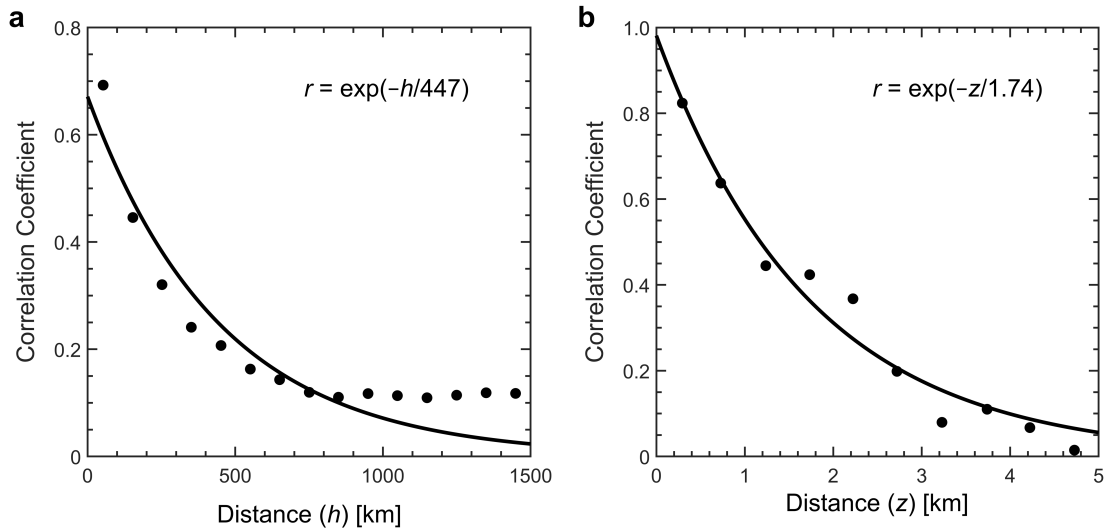

Figure S2. Horizontal and vertical error correlation length for the GEOS-Chem simulation of tropospheric ozone in Asia. The panel (a) shows the correlation coefficients ( $r$ ) of the model errors between pairs of surface monitoring sites relative to surface ozone observations from the China National Environmental Monitoring Center (CNEMC; <http://www.cnemc.cn/>, last access: 28 October 2022) and plotted against the horizontal distance  $h$  (in km, binned every 100 km). The panel (b) shows the correlation coefficients of the model errors between pairs of vertical levels (from surface to 8 km altitude) relative to ozonesonde measurements (Shu *et al.*, 2022) and plotted against the vertical distance  $z$  (in km, binned every 500 m). Exponential fits based on the least-squares method to the data are shown inset.

30

35

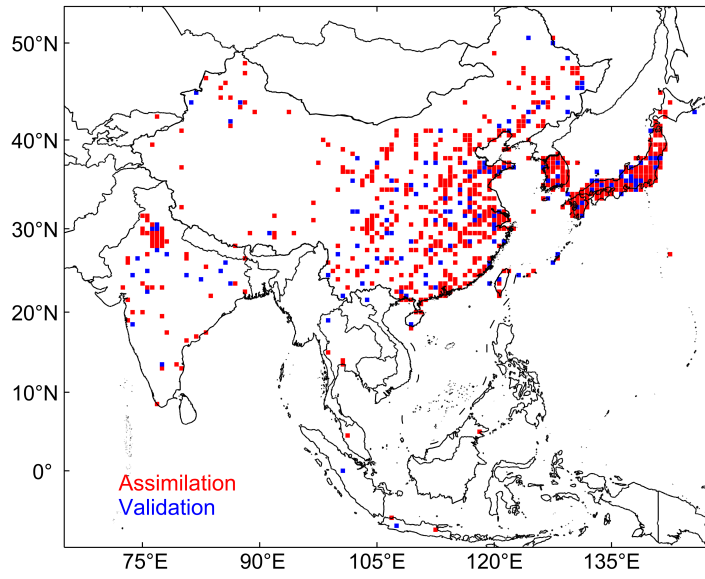

**Figure S3. Distribution of super-observation grids for assimilation (red) and validation (blue) over the Asian domain.**

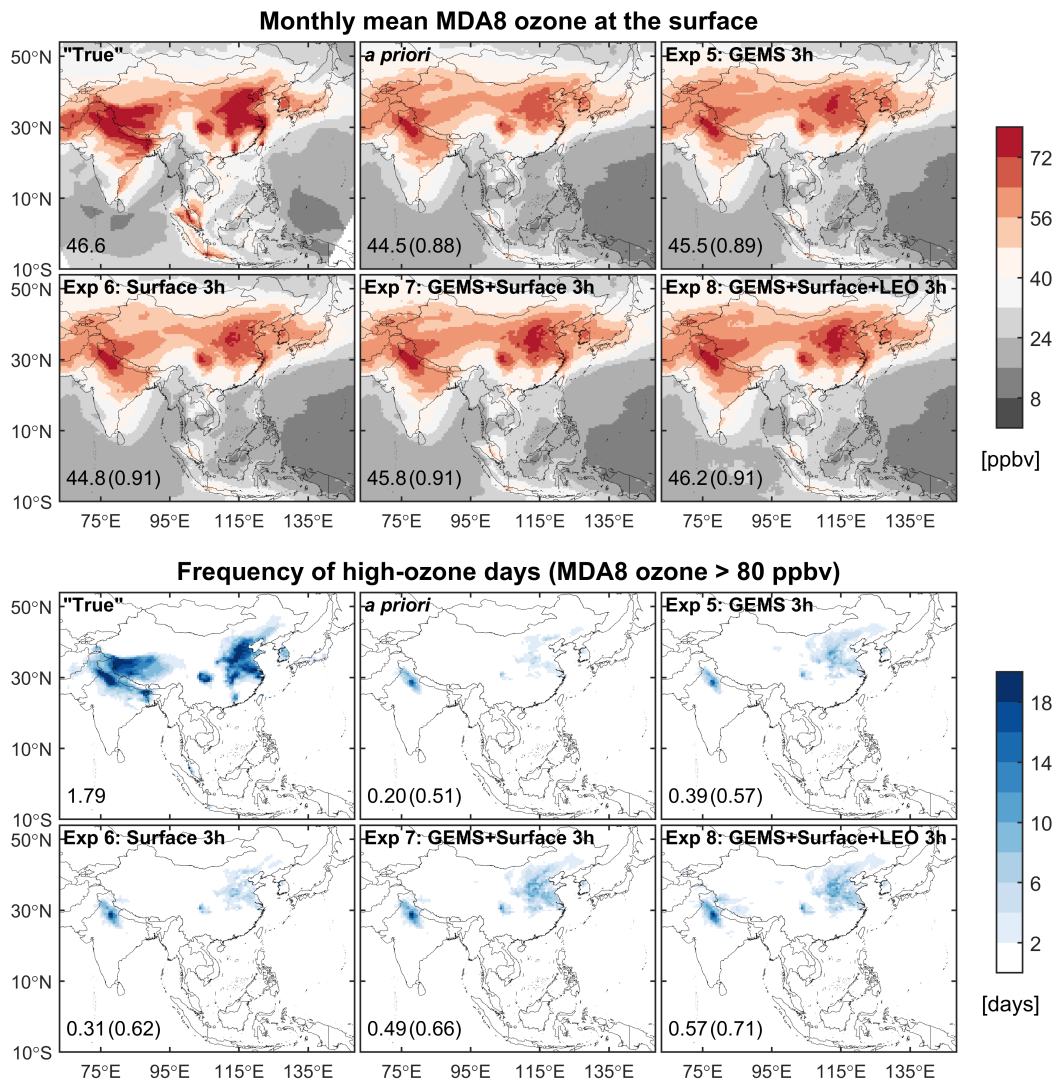

40 Figure S4. Same as Fig. 4 but for *assimilation runs* with the assimilation time step of 3 h (Exp 5–8 in Table 1).

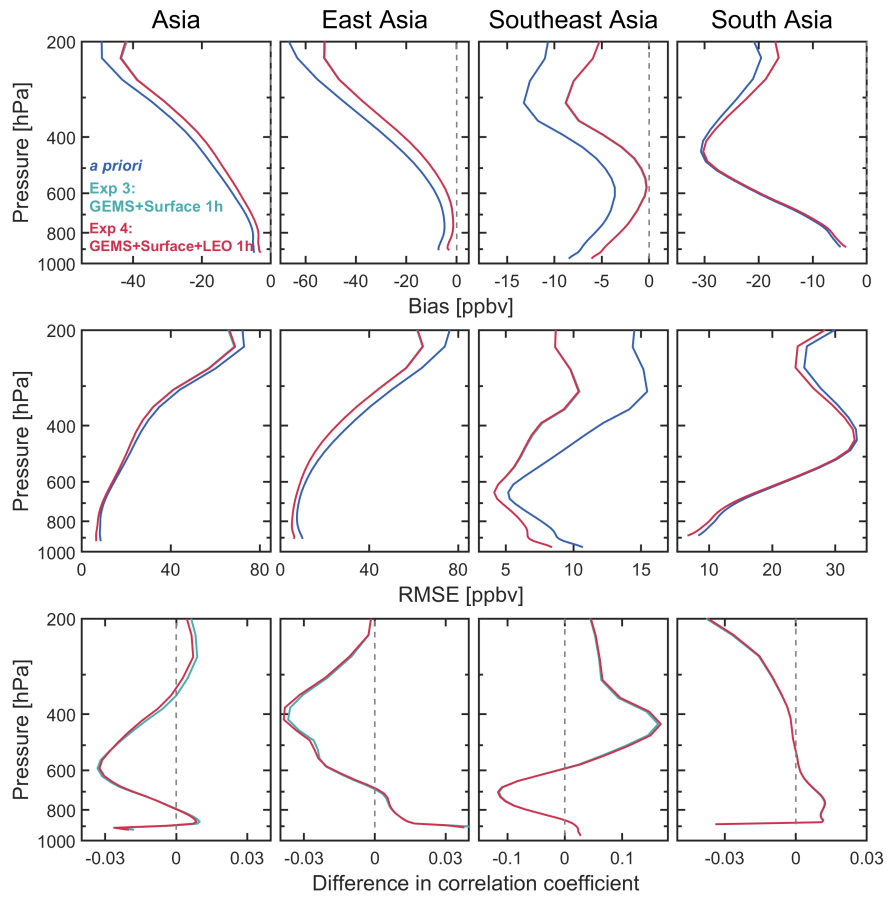

Figure S5. Same as Fig.7 but for *assimilation runs* with the assimilation time step of 1 h (Exp 3 and 4 in Table 1).

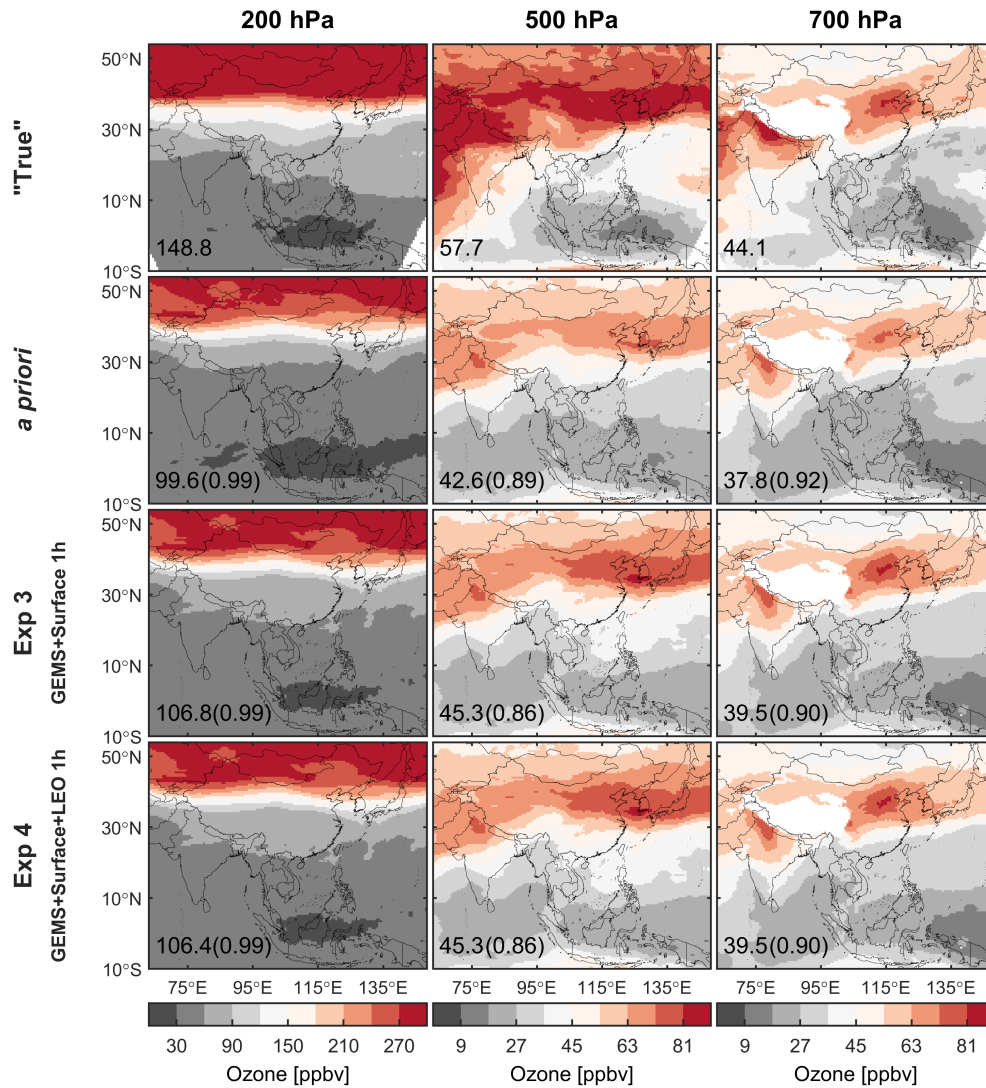

45

Figure S6. Same as Fig. 8 but for *assimilation runs* with the assimilation time step of 1 h (Exp 3 and 4 in Table 1).



## References

- Bey, I., Jacob, D. J., Yantosca, R. M., Logan, J. A., Field, B. D., Fiore, A. M., Li, Q., Liu, H. Y., Mickley, L. J., and Schultz, M. G.: Global modeling of tropospheric chemistry with assimilated meteorology: Model description and evaluation, *J. Geophys. Res. Atmos.*, 106, 23073–23095, <https://doi.org/10.1029/2001JD000807>, 2001.
- Gelaro, R., McCarty, W., Suárez, M. J., Todling, R., Molod, A., Takacs, L., Randles, C. A., Darmenov, A., Bosilovich, M. G., Reichle, R., Wargan, K., Coy, L., Cullather, R., Draper, C., Akella, S., Buchard, V., Conaty, A., da Silva, A. M., Gu, W., Kim, G.-K., Koster, R., Lucchesi, R., Merkova, D., Nielsen, J. E., Partyka, G., Pawson, S., Putman, W., Rienecker, M., Schubert, S. D., Sienkiewicz, M., and Zhao, B.: The Modern-Era Retrospective Analysis for Research and Applications, Version 2 (MERRA-2), *J. Climate*, 30, 5419–5454, <https://doi.org/10.1175/jcli-d-16-0758.1>, 2017.
- Gottelman, A., Mills, M. J., Kinnison, D. E., Garcia, R. R., Smith, A. K., Marsh, D. R., Tilmes, S., Vitt, F., Bardeen, C. G., McInerney, J., Liu, H.-L., Solomon, S. C., Polvani, L. M., Emmons, L. K., Lamarque, J.-F., Richter, J. H., Glanville, A. S., Bacmeister, J. T., Phillips, A. S., Neale, R. B., Simpson, I. R., DuVivier, A. K., Hodzic, A., and Randel, W. J.: The Whole Atmosphere Community Climate Model Version 6 (WACCM6), *J. Geophys. Res. Atmos.*, 124, 12380–12403, <https://doi.org/10.1029/2019JD030943>, 2019.
- Giglio, L., Randerson, J. T., and van der Werf, G. R.: Analysis of daily, monthly, and annual burned area using the fourth-generation global fire emissions database (GFED4), *J. Geophys. Res. Biogeosci.*, 118, 317–328, <https://doi.org/10.1002/jgrg.20042>, 2013.
- Guenther, A. B., Jiang, X., Heald, C. L., Sakulyanontvittaya, T., Duhl, T., Emmons, L. K., and Wang, X.: The Model of Emissions of Gases and Aerosols from Nature version 2.1 (MEGAN2.1): an extended and updated framework for modeling biogenic emissions, *Geosci. Model Dev.*, 5, 1471–1492, <https://doi.org/10.5194/gmd-5-1471-2012>, 2012.
- Hoesly, R. M., Smith, S. J., Feng, L., Klimont, Z., Janssens-Maenhout, G., Pitkanen, T., Seibert, J. J., Vu, L., Andres, R. J., Bolt, R. M., Bond, T. C., Dawidowski, L., Kholod, N., Kurokawa, J. I., Li, M., Liu, L., Lu, Z., Moura, M. C. P., O'Rourke, P. R., and Zhang, Q.: Historical (1750–2014) anthropogenic emissions of reactive gases and aerosols from the Community Emissions Data System (CEDS), *Geosci. Model Dev.*, 11, 369–408, <https://doi.org/10.5194/gmd-11-369-2018>, 2018.
- Janssens-Maenhout, G., Crippa, M., Guizzardi, D., Dentener, F., Muntean, M., Pouliot, G., Keating, T., Zhang, Q., Kurokawa, J., Wankmüller, R., Denier van der Gon, H., Kuenen, J. J. P., Klimont, Z., Frost, G., Darras, S., Koffi, B., and Li, M.: HTAP\_v2.2: a mosaic of regional and global emission grid maps for 2008 and 2010 to study hemispheric transport of air pollution, *Atmos. Chem. Phys.*, 15, 11411–11432, <https://doi.org/10.5194/acp-15-11411-2015>, 2015.
- Li, M., Zhang, Q., Kurokawa, J. I., Woo, J. H., He, K., Lu, Z., Ohara, T., Song, Y., Streets, D. G., Carmichael, G. R., Cheng, Y., Hong, C., Huo, H., Jiang, X., Kang, S., Liu, F., Su, H., and Zheng, B.: MIX: a mosaic Asian anthropogenic emission inventory under the international collaboration framework of the MICS-Asia and HTAP, *Atmos. Chem. Phys.*, 17, 935–963, <https://doi.org/10.5194/acp-17-935-2017>, 2017.

- Mao, J., Paulot, F., Jacob, D. J., Cohen, R. C., Crouse, J. D., Wennberg, P. O., Keller, C. A., Hudman, R. C., Barkley, M. P., and Horowitz, L. W.: Ozone and organic nitrates over the eastern United States: Sensitivity to isoprene chemistry, *J. Geophys. Res. Atmos.*, 118, 11,256–211,268, <https://doi.org/10.1002/jgrd.50817>, 2013.
- 85 Park, R. J., Jacob, D. J., Field, B. D., Yantosca, R. M., and Chin, M.: Natural and transboundary pollution influences on sulfate-nitrate-ammonium aerosols in the United States: Implications for policy, *J. Geophys. Res. Atmos.*, 109, <https://doi.org/10.1029/2003JD004473>, 2004.
- Shu, L., Zhu, L., Bak, J., Zoogman, P., Han, H., Long, X., Bai, B., Liu, S., Wang, D., Sun, W., Pu, D., Chen, Y., Li, X., Sun, S., Li, J., Zuo, X., Yang, X., and Fu, T.-M.: Improved ozone simulation in East Asia via assimilating observations from the first geostationary air-quality monitoring satellite: Insights from an Observing System Simulation Experiment, *Atmos. Environ.*, 274, 119003, <https://doi.org/10.1016/j.atmosenv.2022.119003>, 2022.
- 90 Wiedinmyer, C., Akagi, S. K., Yokelson, R. J., Emmons, L. K., Al-Saadi, J. A., Orlando, J. J., and Soja, A. J.: The Fire INventory from NCAR (FINN): a high resolution global model to estimate the emissions from open burning, *Geosci. Model Dev.*, 4, 625–641, <https://doi.org/10.5194/gmd-4-625-2011>, 2011.
- Zaveri, R. A., and Peters, L. K.: A new lumped structure photochemical mechanism for large-scale applications, *J. Geophys. Res. Atmos.*, 104, 30387–30415, <https://doi.org/10.1029/1999JD900876>, 1999.
- 95 Zaveri, R. A., Easter, R. C., Fast, J. D., and Peters, L. K.: Model for Simulating Aerosol Interactions and Chemistry (MOSAIC), *J. Geophys. Res. Atmos.*, 113, <https://doi.org/10.1029/2007JD008782>, 2008.
- Zheng, B., Tong, D., Li, M., Liu, F., Hong, C., Geng, G., Li, H., Li, X., Peng, L., Qi, J., Yan, L., Zhang, Y., Zhao, H., Zheng, Y., He, K., and Zhang, Q.: Trends in China's anthropogenic emissions since 2010 as the consequence of clean air actions, *Atmos. Chem. Phys.*, 18, 14095–14111, <https://doi.org/10.5194/acp-18-14095-2018>, 2018.
- 100
